# Supplementary material for: A dual-channel fluorescent probe for monitoring pH changes in lysosomes during autophagy
Source: Royal Society of Chemistry journal article supplement (doi:10.1039/d1nj03214c), 2021-01-01

Supporting Information for

**Dual-channel fluorescent probe for monitoring pH change in  
lysosomal during autophagy**

Yonghui Huo, Xing Liang, Jun Yan, Ling Huang, Weiyong Lin \*

Guangxi Key Laboratory of Electrochemical Energy Materials, Institute of Optical Materials and  
Chemical Biology, School of Chemistry and Chemical Engineering, Guangxi University, Nanning,  
Guangxi 530004, P. R. China

## Table of contents

|                                                                                           |         |
|-------------------------------------------------------------------------------------------|---------|
| Scheme S1. The synthesis of fluorescent probe BM-HA. ....                                 | S3      |
| Fig. S1. Absorption spectra of <b>RD</b> and <b>RD</b> + H <sup>+</sup> .....             | S4      |
| Fig. S2. The time-dependent fluorescence spectra .....                                    | S4      |
| Fig. S3. pH titration Curves of lg I <sub>556</sub> / I <sub>405</sub> .....              | S4      |
| Fig. S4. Cytotoxicity assays of probe at different concentrations for HL-7702 cells ..... | S5      |
| Fig. S5.- Fig. S9. <sup>1</sup> H NMR, <sup>13</sup> C NMR, and HRMS spectra .....        | S5 – S9 |

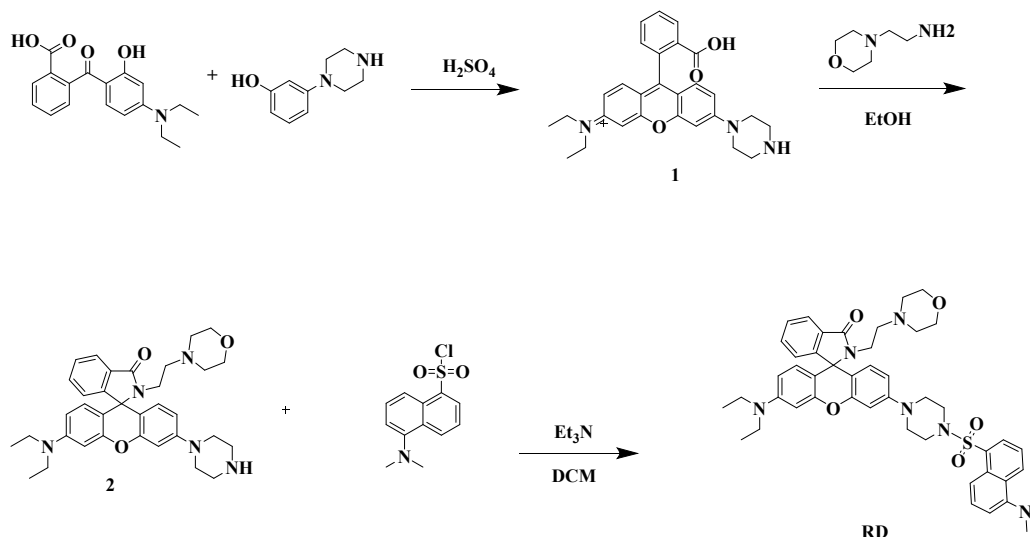

**Scheme S1.** Structure and synthetic route of **RD**

### Synthesis of Compound 1

In 100 mL round bottom flask, 456 mg 4-diethylamine ketoic acid (2.0mmol), 0.3565 g 1-(3-Hydroxyphenyl)-piperazine (2.0 mmol) and 2 mL sulphuric acid were added first. The reaction was heated to 90 °C and refluxed for 3 hours. The solvent was dissolved in 100 mL ice water , and 2 mL perchloric acid was added, then collected red solid precipitated . The crude product was purified by column chromatography on silica gel (CH<sub>2</sub>Cl<sub>2</sub>:CH<sub>3</sub>OH = 10:1) to afford a red solid (784 mg, yield 86.5%). <sup>1</sup>H NMR (500 MHz, CDCl<sub>3</sub>) δ 8.02 (d, J = 7.6 Hz, 1H), 7.66 (t, J = 7.0 Hz, 1H), 7.60 (t, J = 7.3 Hz, 1H), 7.28 (s, 1H), 7.21 (d, J = 7.6 Hz, 1H), 6.71 (d, J = 2.3 Hz, 1H), 6.65 (d, J = 8.8 Hz, 1H), 6.59 (d, J = 9.0 Hz, 1H), 6.46 (s, 1H), 6.36 (d, J = 2.5 Hz, 1H), 3.38 (q, J = 7.1 Hz, 4H), 3.27 - 3.22 (m, 4H), 3.08 - 3.03 (m, 4H), 1.19 (t, J = 7.0 Hz, 6H), 0.94 (dd, J = 13.8, 7.2 Hz, 1H).

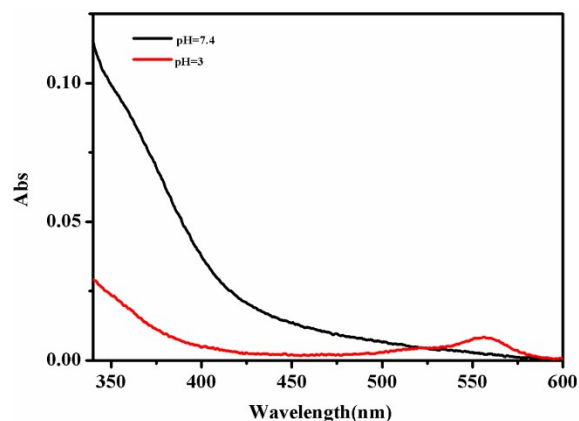

**Figure S1.** The UV-Vis spectra of the probe **RD** with pH 3.2 and 7 in DMSO/ B-R (1/99, v/v) solution

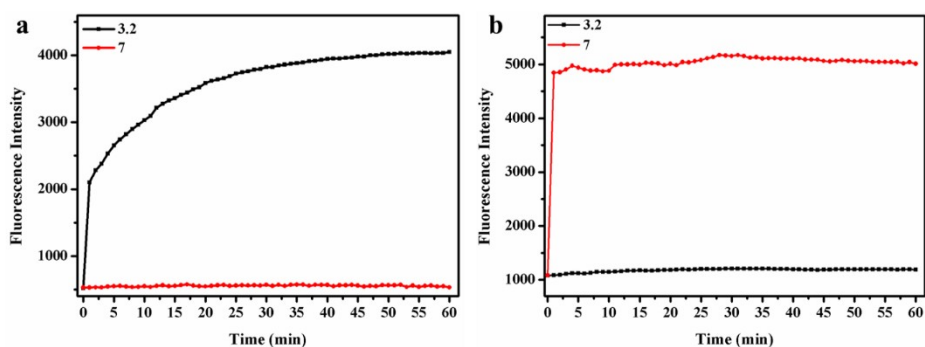

**Figure S2.** The time courses of reaction of the probe **RD** (10  $\mu$ M) in the presence of pH in B-R solution at room temperature. (a)  $\lambda_{ex}$  556 nm (b)  $\lambda_{ex}$  405 nm.

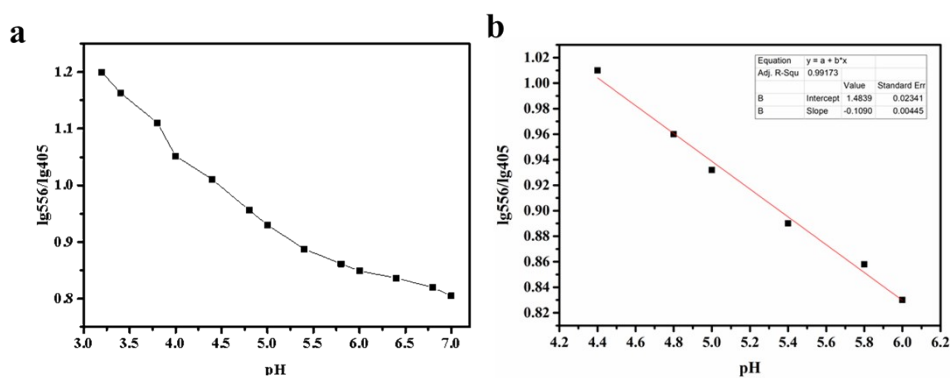

**Figure S3.** (a) pH titration curves of lg ratios between fluorescence emission of Rhodamine ( $I_{556}$  nm) and that of dansyl group ( $I_{405}$  nm). (b) The relationship between the value of  $\lg 556/\lg 405$  and pH 4.4 - 6.

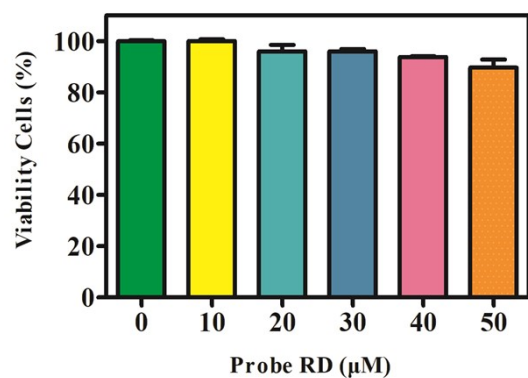

**Figure S4.** Viability of HL-7702 cells treated with the various concentrations of probe RD for 24h.

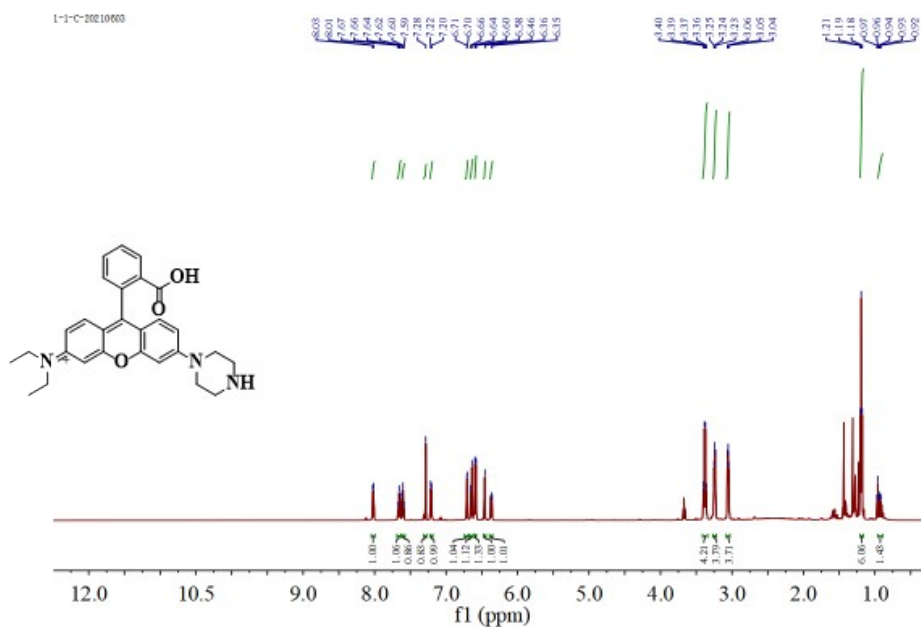

**Figure S5.** <sup>1</sup>H NMR of compound 1.

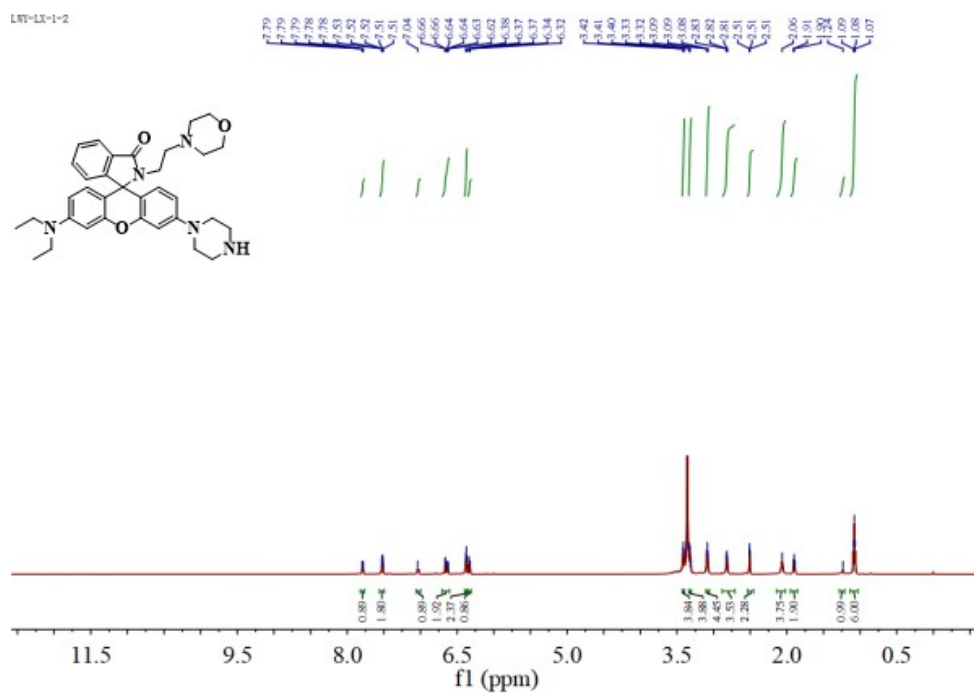

Figure S6.  $^1\text{H}$  NMR of compound 2.

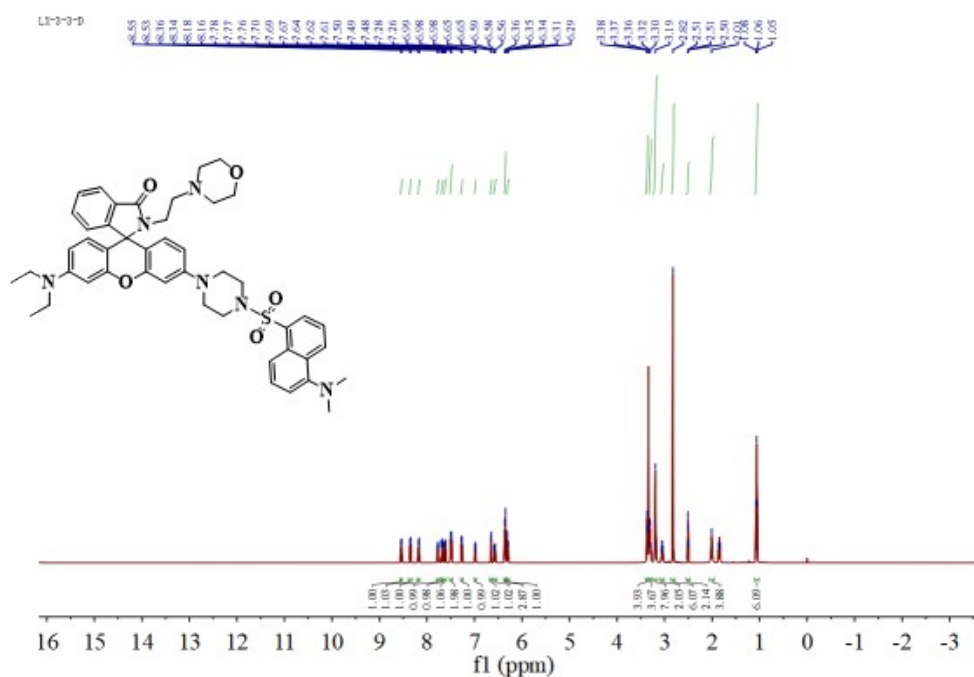

Figure S7.  $^1\text{H}$  NMR of the probe RD

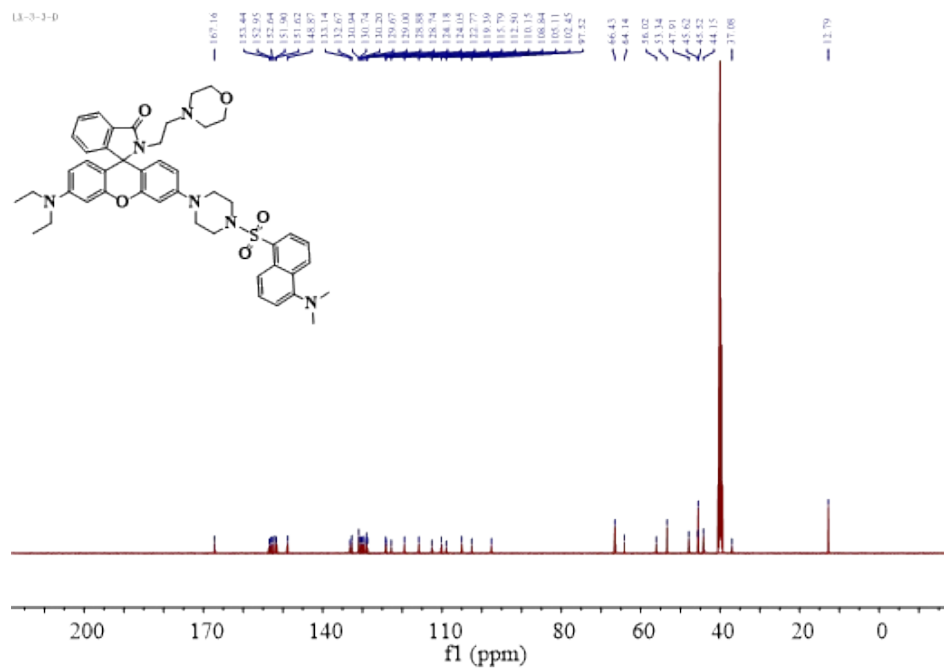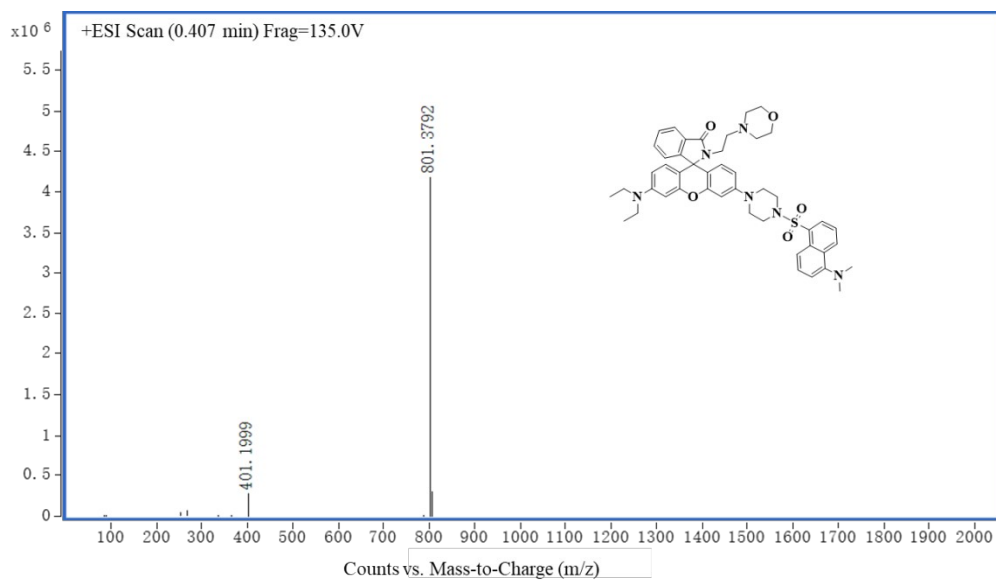

Supplement: d1nj03214c1.pdf [file d1nj03214c1.pdf]
